# Supplementary material for: β-catenin signaling inhibitors ICG-001 and C-82 improve fibrosis in preclinical models of endometriosis
Source: PubMed Central journal article supplement (PMC6934788; doi:10.1038/s41598-019-56302-4), 2019-12-27
Supplement: 41598_2019_56302_MOESM5_ESM.pdf [file 41598_2019_56302_MOESM5_ESM.pdf]

ICG-001

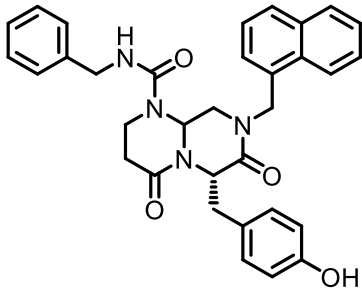

Chemical Formula:  $C_{33}H_{32}N_4O_4$   
Molecular Weight: 548.64

C-82

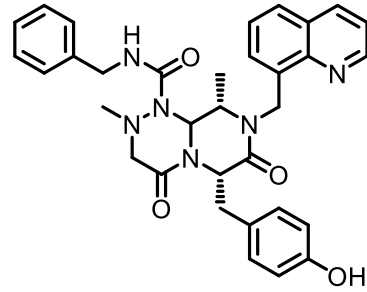

Chemical Formula:  $C_{33}H_{34}N_6O_4$   
Molecular Weight: 578.67
